# Supplementary material for: Theoretical insights into a colorimetric azo-based probe to detect copper ions
Source: Royal Society of Chemistry journal article supplement (doi:10.1039/d0ra02468f), 2020-01-01
Supplement: d0ra02468f1.pdf [file d0ra02468f1.pdf]

### Supporting Information

**Table S1.** Quantum chemical parameters of complexation of AZOs and Cu<sup>2+</sup> (2:1 stoichiometry) calculated with b3lyp/6-31g(d,p)//Lanl2dz.

| Complexation          | Binding Energy (kcal/mol) | Distance (Å)           |                                            |                                           | Angle (°) *                              |                                         |               |
|-----------------------|---------------------------|------------------------|--------------------------------------------|-------------------------------------------|------------------------------------------|-----------------------------------------|---------------|
|                       |                           | Cu <sup>2+</sup> ... N | Cu <sup>2+</sup> ... O <sub>carboxyl</sub> | Cu <sup>2+</sup> ... O <sub>methoxy</sub> | ∠NCu <sup>2+</sup> O <sub>carboxyl</sub> | ∠NCu <sup>2+</sup> O <sub>methoxy</sub> |               |
| 1+Cu <sup>2+</sup> +1 | a1                        | -219.327               | 2.161 and 2.170                            | 1.919 and 1.938                           | 2.742 and 2.877                          | 81.0 and 84.4                           | 65.1 and 63.2 |
|                       | a2                        | -223.606               | 2.115 and 2.128                            | 1.954 and 1.971                           | 2.457 and 2.577                          | 82.8 and 83.9                           | 73.5 and 75.7 |
|                       | a3                        | -216.900               | 2.162 and 2.165                            | 1.946 and 1.947                           | 2.862 and 2.891                          | 81.9 and 82.0                           | 63.0 and 63.6 |
| 2+Cu <sup>2+</sup> +2 | b1                        | -206.043               | 2.166 and 2.208                            | 1.933 and 1.935                           | --                                       | 83.5 and 96.1                           | --            |
|                       | b2                        | -213.857               | 2.150 and 2.150                            | 1.914 and 1.914                           | --                                       | 84.3 and 84.3                           | --            |
|                       | b3                        | -204.890               | 2.189 and 2.228                            | 1.929 and 1.931                           | --                                       | 83.0 and 96.5                           | --            |
|                       | b4                        | -213.894               | 2.151 and 2.152                            | 1.914 and 1.914                           | --                                       | 84.3 and 84.4                           | --            |

\* There were total four ∠NCu<sup>2+</sup>O<sub>carboxyl</sub> angles, only two smaller values were recorded here, and the same for ∠NCu<sup>2+</sup>O<sub>methoxy</sub>.

**Table S2.** Binding energies of complexation of AZOs 1:1 stoichiometry chelated to  $\text{Cu}^{2+}$  calculated with b3lyp/6-31g(d,p)//Lanl2dz.

| Complexation                           | Binding Energies (kcal/mol) |              |            |
|----------------------------------------|-----------------------------|--------------|------------|
|                                        | $\Delta E_1$                | $\Delta E_2$ | $\Delta E$ |
| $1+\text{Cu}^{2+}+2\text{Cl}^-$        | -119.263                    | -32.925      | -241.589   |
| $1+\text{Cu}^{2+}+2\text{H}_2\text{O}$ | -160.862                    | -32.421      | -248.296   |
| $2+\text{Cu}^{2+}+\text{Cl}^-$         | -127.272                    | -27.833      | -224.407   |
| $2+\text{Cu}^{2+}+\text{H}_2\text{O}$  | -174.463                    | -23.001      | -222.576   |

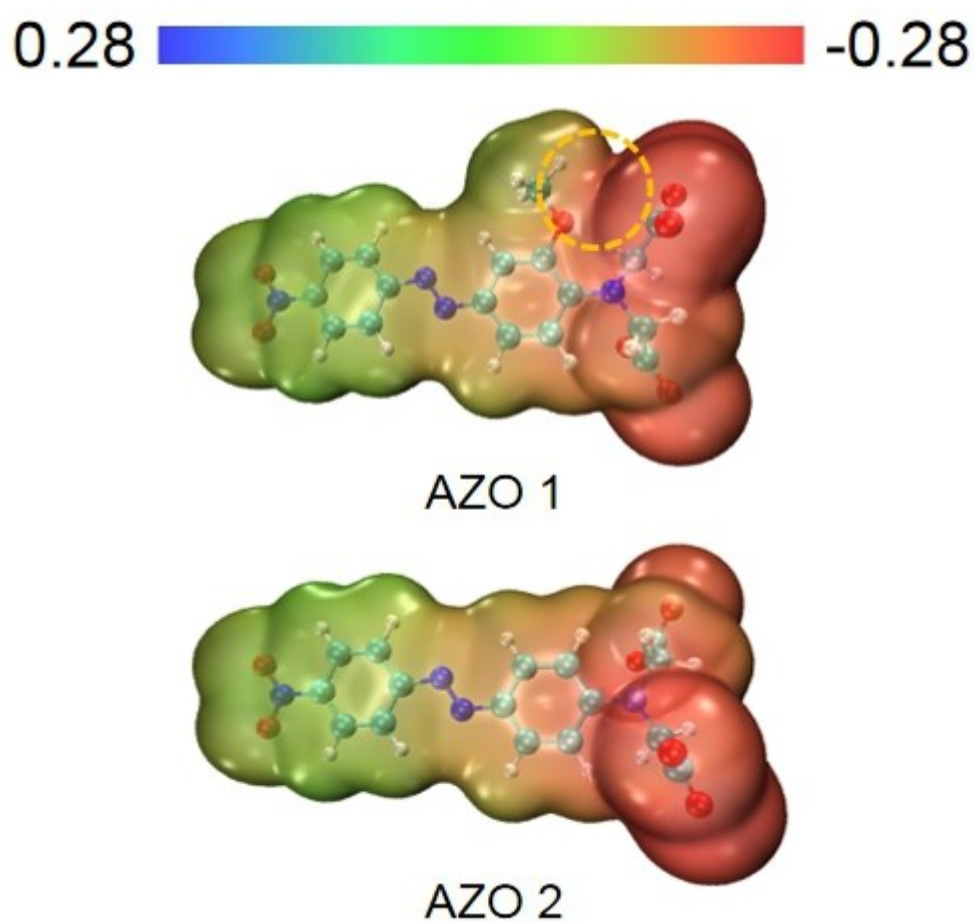

**Figure S1.** The mapped electrostatic potential surfaces of AZO 1 and AZO 2.

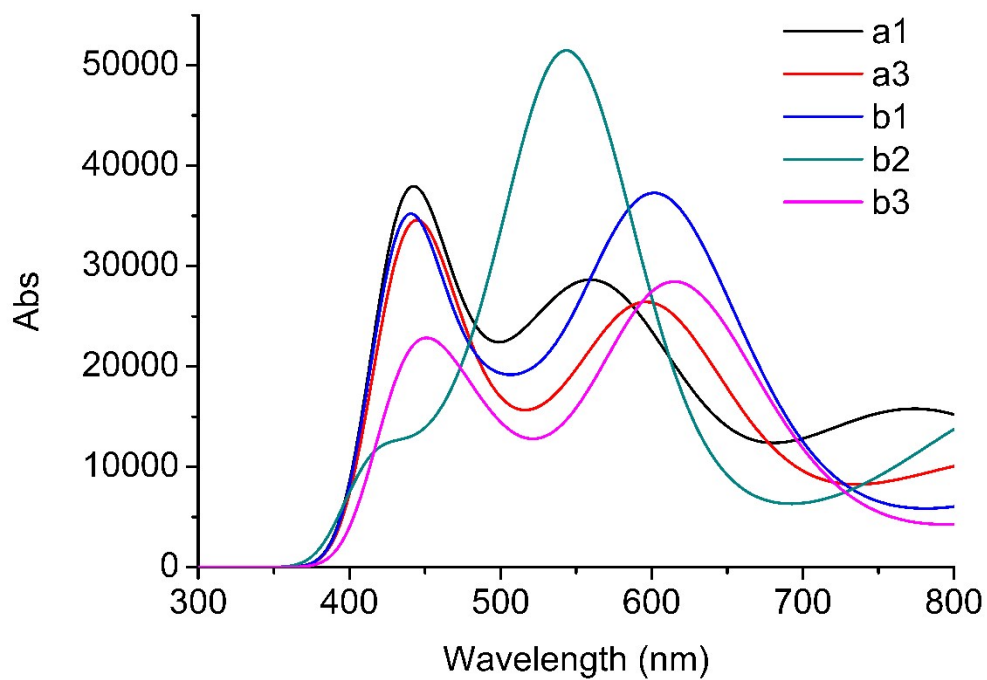

**Figure S2.** Calculated UV-vis spectra of complexztion of 2:1 stoichiometry for AZOs and  $\text{Cu}^{2+}$  of a1, a3, b1, b2 and b3 at the levels of td-b3lyp/6-31g(d,p)//Lan12dz.

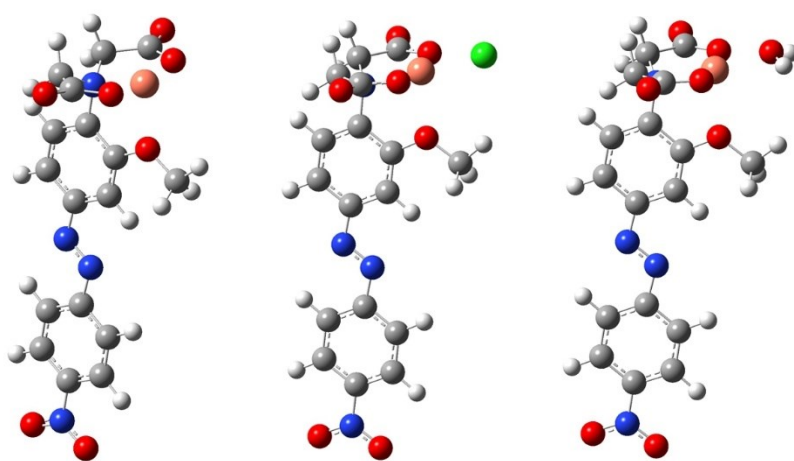

complexation of 1:1 stoichiometry for AZO 1 and Cu<sup>2+</sup>

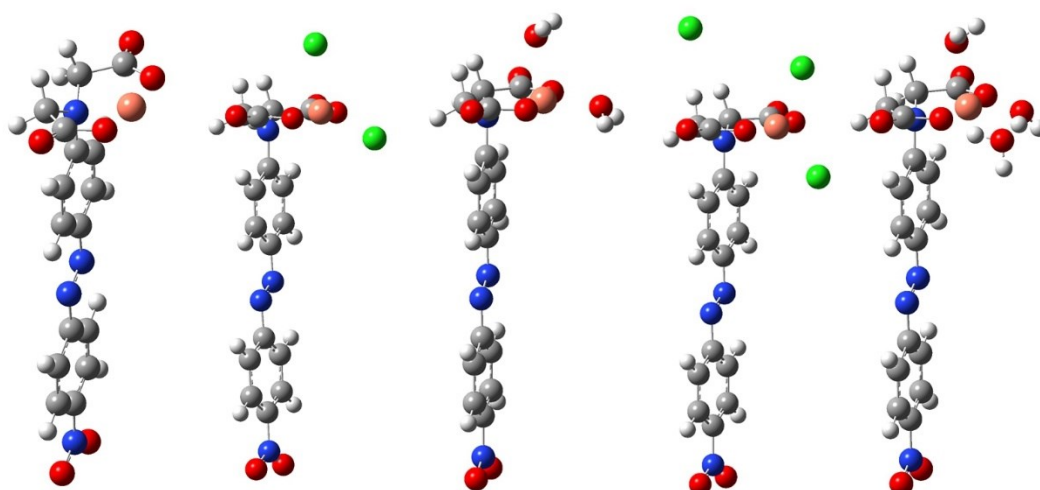

complexation of 1:1 stoichiometry for AZO 2 and Cu<sup>2+</sup>

**Figure S3.** Other optimized structures of 1:1 stoichiometry for AZOs and Cu<sup>2+</sup>, except the complexation in Figure 5, calculated at the levels of b3lyp/6-31g(d,p)//Lanl2dz.

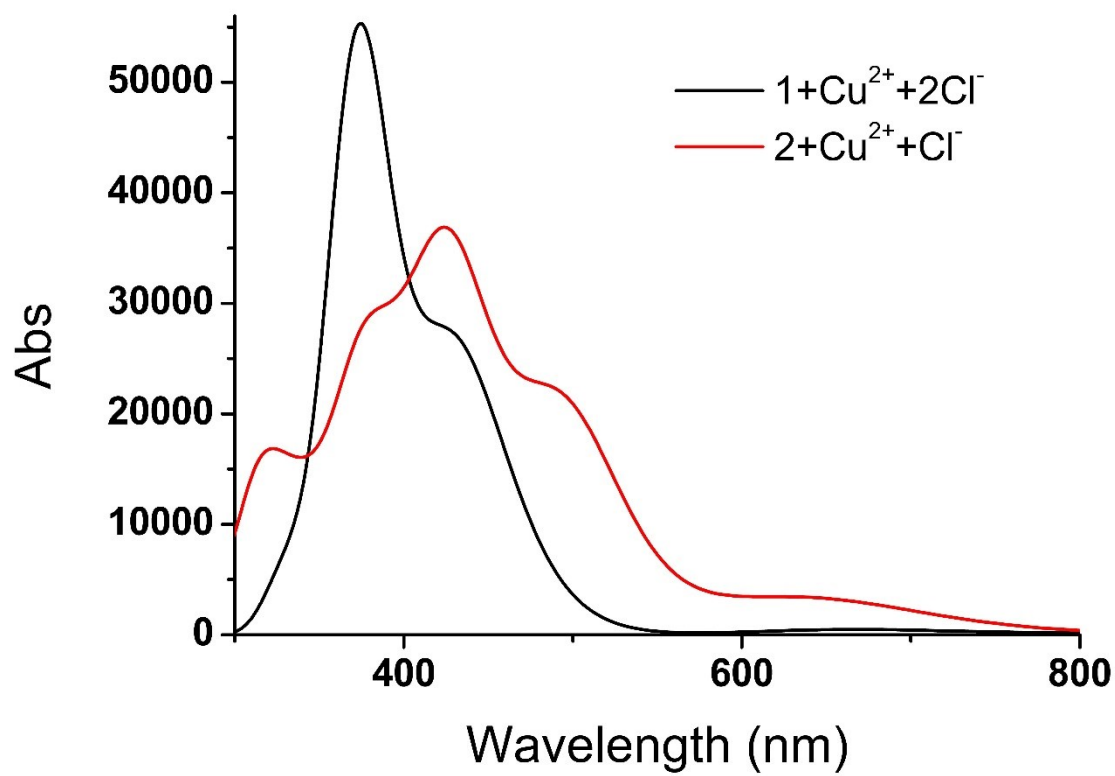

**Figure S4.** Calculated UV-vis spectra of 1+Cu<sup>2+</sup>+2Cl<sup>-</sup> and 2+Cu<sup>2+</sup>+Cl<sup>-</sup>.
